# Supplementary material
Source: Royal Society of Chemistry journal article supplement (doi:10.1039/d6tc00994h)
Supplement: d6tc00994h1.pdf [file d6tc00994h1.pdf]

# Defect and Carrier Engineering in Er-Doped ZnSe Enables Synergistic Electromagnetic and Charge-Transfer SERS Enhancement

Jie Li<sup>a</sup>, Yantao Lou<sup>a</sup>, Ze Wang<sup>a</sup>, V Balasubramani<sup>a</sup>, Xingchen Zhang<sup>a</sup>, Jiaren Wu<sup>a</sup>, Guodong Lin<sup>a</sup>,  
Baofeng Zhang<sup>b</sup>, Yuanjie Teng<sup>a\*</sup>

<sup>a</sup>National Key Laboratory of Green Chemical Synthesis and Transformation Technology, College of Chemical Engineering, Zhejiang University  
of Technology, Hangzhou, Zhejiang 310014, China

<sup>b</sup>Hangzhou Ecological Environment Monitoring Center, Hangzhou, Zhejiang 310013, China

\*Corresponding authors' e-mail: yuanjieteng@zjut.edu.cn

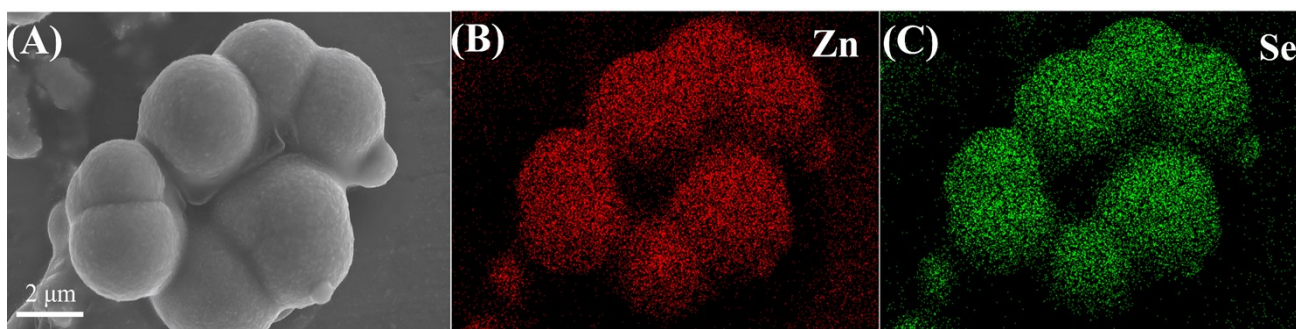

Figure S1. SEM image of ZnSe (A) and EDS mapping image (B) Zn, (C) Se

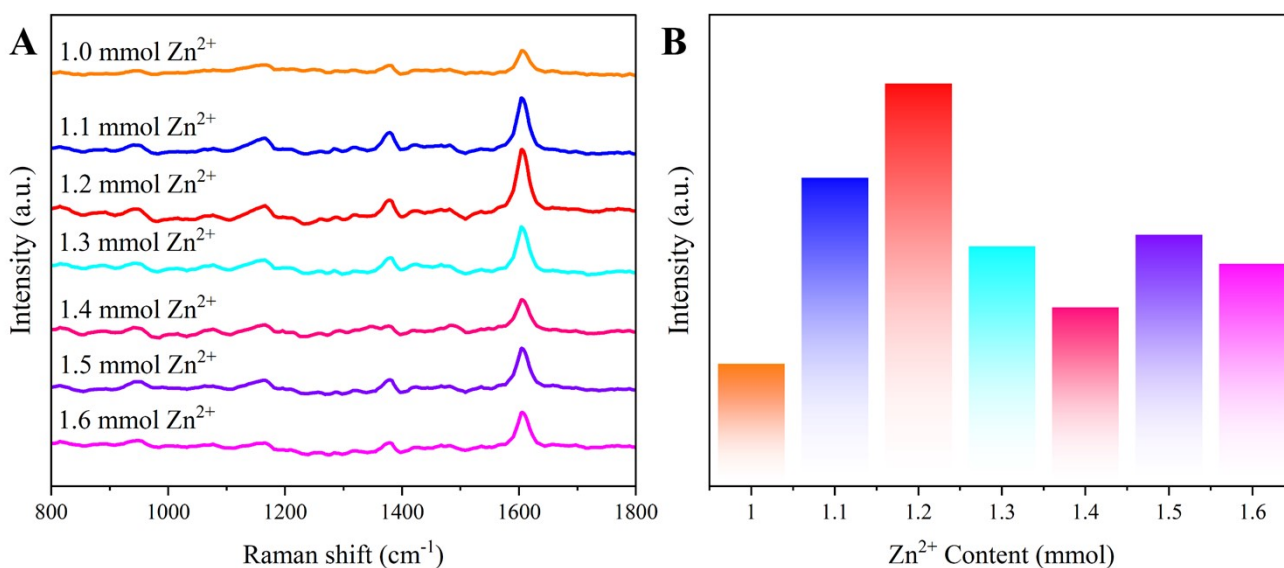

Figure S2. (A) Comparison of normalized SERS signals of MB at different Zn<sup>2+</sup> contents, (B) comparison of the  
normalized SERS intensity of the MB Raman peak at 1600 cm<sup>-1</sup>

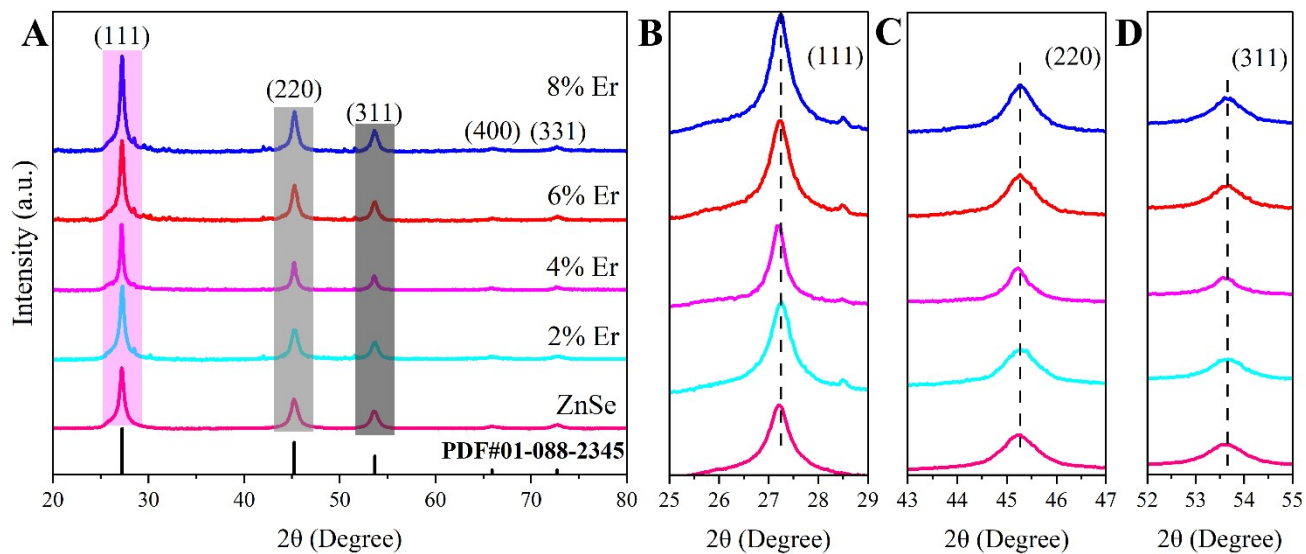

Figure S3. Effect of Er doping on the XRD characteristic peaks of ZnSe: (A) original diffraction patterns, (B) (111) plane, (C) (220) plane, and (D) (311) plane

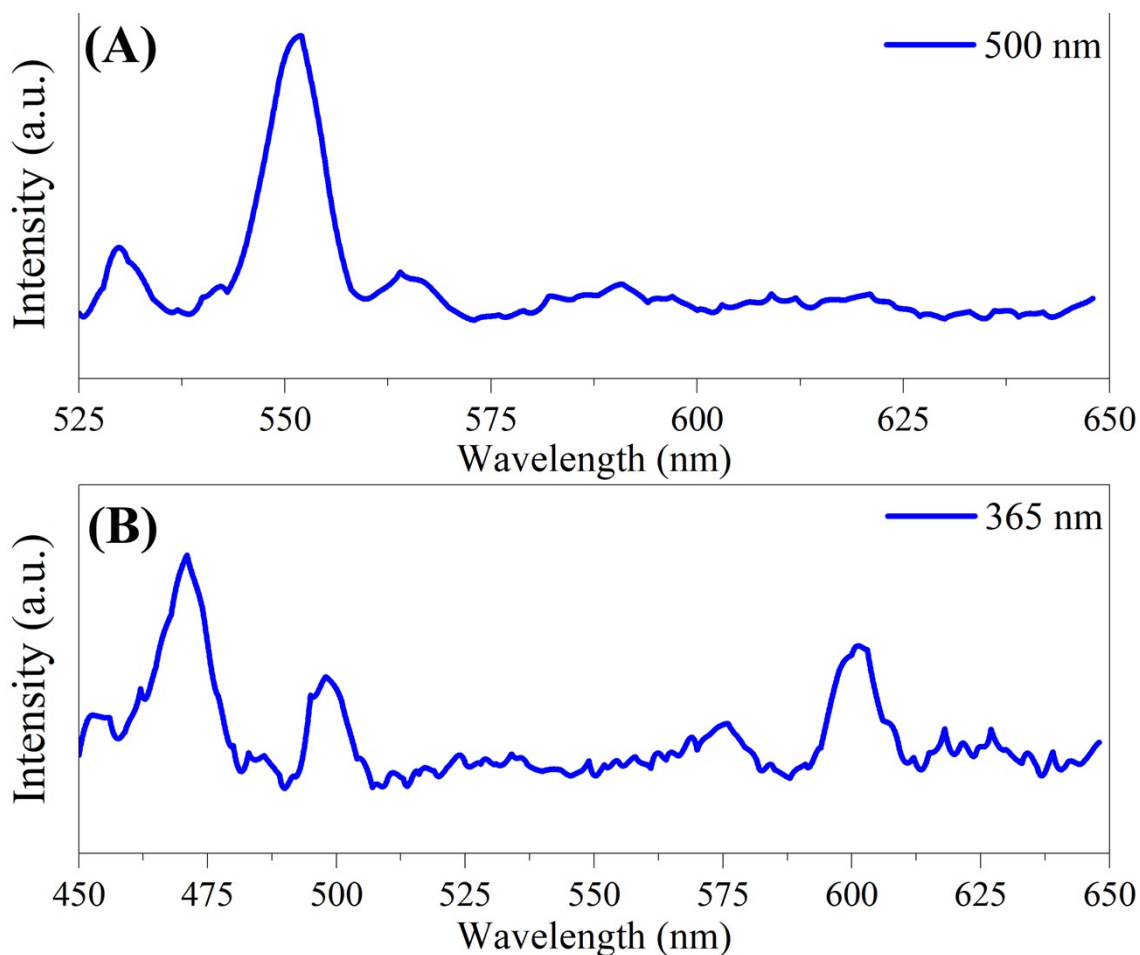

Figure S4. Fluorescence spectra of Er-ZnSe under different excitation wavelengths: (A) 500 nm, (B) 365 nm

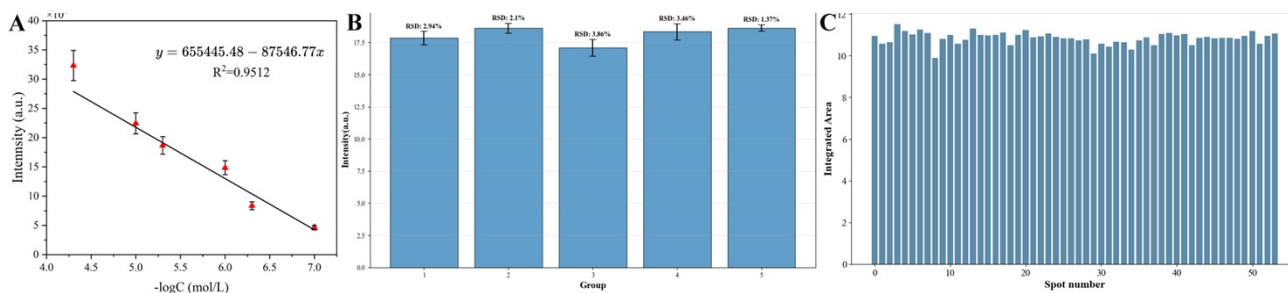

Figure S5. (A) Linear relationship between the Raman intensity of the MB characteristic peak at 1600 cm<sup>-1</sup> and concentration, along with reproducibility; (B) variations among different batches; and (C) measurements at different spots

### Calculation of Enhancement Factor

The enhancement factor (EF) was calculated using the data from Figure 4C and Equation S1<sup>[1]</sup>:

$$EF = \left( \frac{I_{SERS}}{I_{Raman}} \right) \times \left( \frac{C_{Raman}}{C_{SERS}} \right) \#(S1)$$

where  $I_{SERS}$  and  $I_{Raman}$  represent the Raman intensity of the probe molecule MB under SERS and normal conditions, respectively, and  $C_{SERS}$  and  $C_{Raman}$  are the corresponding concentrations of MB used in the measurements. The EF value was estimated to be approximately  $1.74 \times 10^4$ .

## 20 Carrier Density

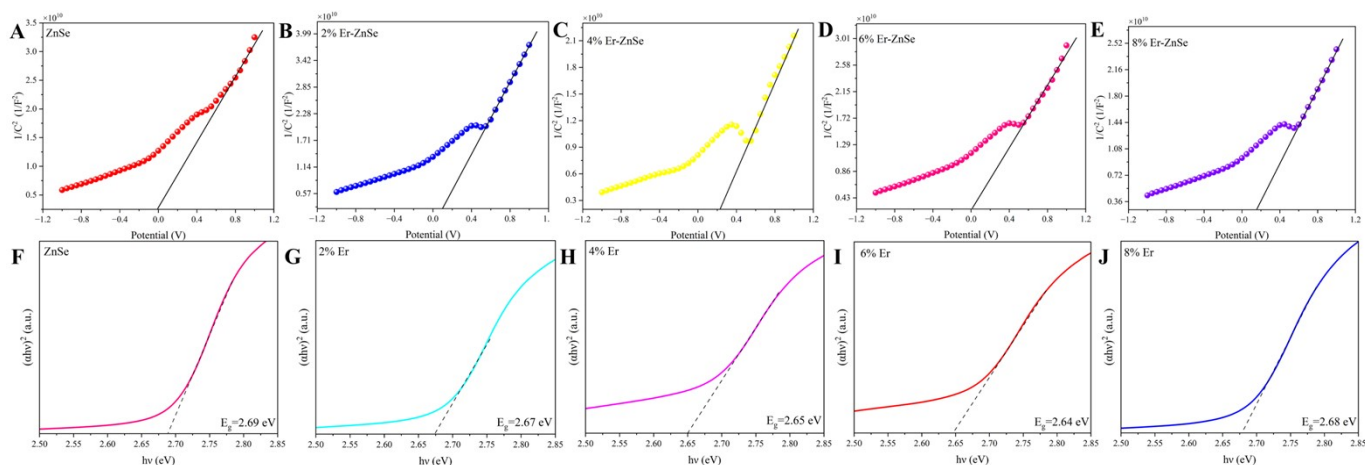

21

22 Figure S6. Mott-Schottky (M-S) plots of ZnSe with different Er doping levels: (A) ZnSe, (B) 2%, (C) 4%, (D) 6%,

23 and (E) 8%; and UV-vis DRS: (F) ZnSe, (G) 2%, (H) 4%, (I) 6%, and (J) 8%

24

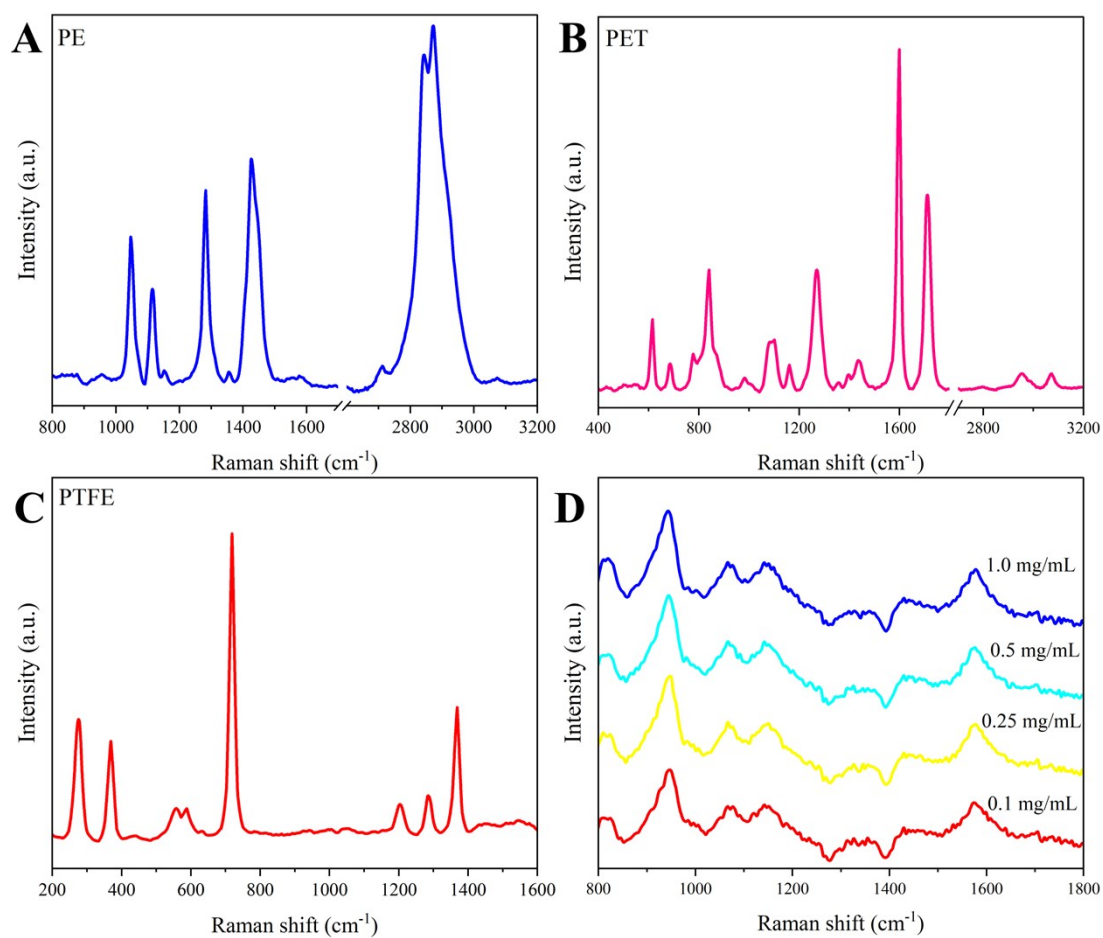

25

26 Figure S7. Raman spectra of plastics: (A) PE, (B) PET, (C) PTFE, and (D) SERS-enhanced spectrum of PTFE

27

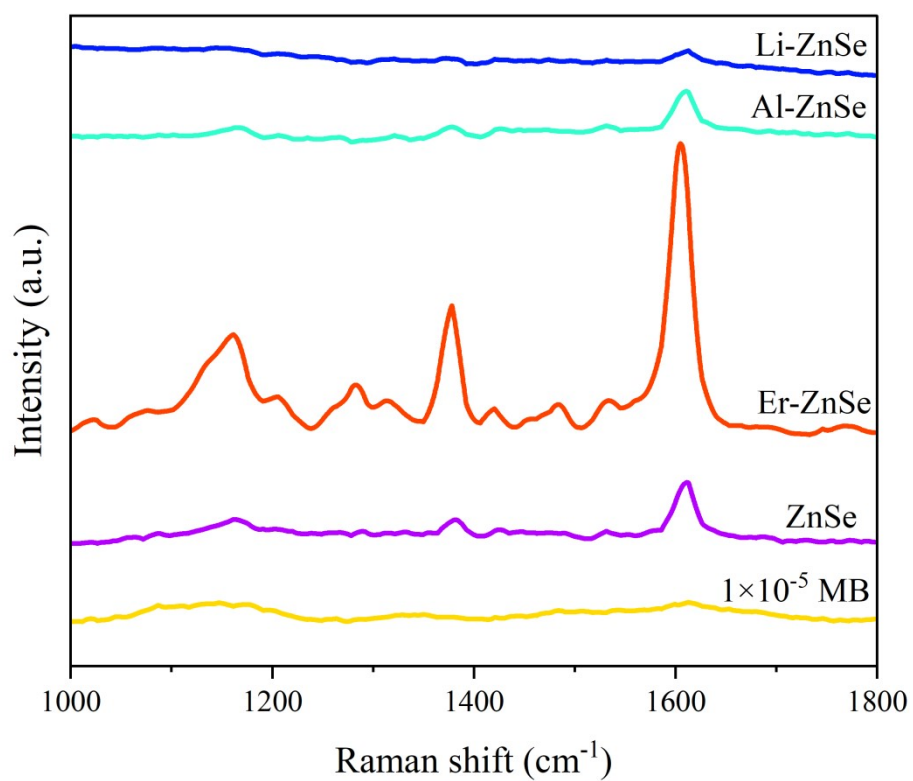

29

30

Figure S8. Comparative study of SERS performance in ZnSe with various dopants

31

32

33

Table S1.  $\rho_{CT}$  determined under 785 nm laser excitation

| Er doped | $\rho_{CT}(1)$ | $\rho_{CT}(2)$ | $\rho_{CT}(3)$ | $\bar{\rho}_{CT}$ |
|----------|----------------|----------------|----------------|-------------------|
| 0%       | 0.27886        | 0.29761        | 0.29048        | 0.28898           |
| 2%       | 0.27237        | 0.32145        | 0.33359        | 0.30913           |
| 4%       | 0.27053        | 0.25377        | 0.29663        | 0.27364           |
| 6%       | 0.24566        | 0.26039        | 0.26464        | 0.25689           |
| 8%       | 0.27344        | 0.26884        | 0.27047        | 0.27092           |

34

35

36

37 Table S2. Raman characteristic peaks of PE, PTFE, and PET and their corresponding vibrational mode assignments

| Sample      | Structure Simplified                                                                | Characteristic Peak (cm <sup>-1</sup> ) | Vibration Type                                                 |
|-------------|-------------------------------------------------------------------------------------|-----------------------------------------|----------------------------------------------------------------|
| <b>PE</b>   | 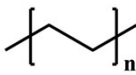   | 2871                                    | CH <sub>2</sub> asymmetric stretching vibration                |
|             |                                                                                     | 2843                                    | CH <sub>2</sub> symmetric stretching vibration                 |
|             |                                                                                     | 1426                                    | CH <sub>2</sub> bending vibration                              |
|             |                                                                                     | 1282                                    | CH <sub>2</sub> twisting vibration                             |
|             |                                                                                     | 1045、1113                               | All-trans stretching vibration of the C-C backbone             |
| <b>PTFE</b> |    | 1368                                    | Associated with the amorphous phase or defects                 |
|             |                                                                                     | 1283                                    | C-F asymmetric stretching vibration                            |
|             |                                                                                     | 1203                                    | C-F symmetric stretching vibration                             |
|             |                                                                                     | 720                                     | Symmetric stretching vibration of the C-C backbone             |
|             |                                                                                     | 557、586                                 | CF <sub>2</sub> bending vibration                              |
|             |                                                                                     | 369                                     | Backbone deformation vibration of the helical chain            |
| <b>PET</b>  |  | 277                                     | Lattice vibration of the helical conformation                  |
|             |                                                                                     | 3071                                    | Aromatic ring C-H stretching vibration                         |
|             |                                                                                     | 2955                                    | CH <sub>2</sub> asymmetric and symmetric stretching vibrations |
|             |                                                                                     | 1710                                    | C=O stretching vibration                                       |
|             |                                                                                     | 1600                                    | C-C stretching vibration of the benzene ring skeleton          |
|             |                                                                                     | 1270                                    | Coupled vibration of C(O)-O stretching and benzene ring        |
|             |                                                                                     | 840                                     | Out-of-plane C-H bending vibration of the benzene ring         |
| 615         | In-plane deformation vibration of the benzene ring                                  |                                         |                                                                |

Table S3. Comparison of the LOD and EF of this work with previous reports for SERS substrates enhancing non-resonant molecules

| SERS Substrates                                                    | Probe | LOD/M             | EF                   | Laser/nm | Mechanism |
|--------------------------------------------------------------------|-------|-------------------|----------------------|----------|-----------|
| Ag-ZnSe nanowires <sup>[2]</sup>                                   | R6G   | 10 <sup>-11</sup> | 6.92×10 <sup>7</sup> | 532      | CM        |
| Ag-ZnSe/HMM <sup>[3]</sup>                                         | R6G   | 10 <sup>-12</sup> | 3.14×10 <sup>8</sup> | 532      | CM        |
| MoO <sub>2</sub> /ZnSe nanocomposites <sup>[4]</sup>               | MB    | 10 <sup>-8</sup>  | 5.03×10 <sup>5</sup> | 532      | CM        |
| Ag@ZnSe <sup>[5]</sup>                                             | 4-MBA | --                | 8.79×10 <sup>5</sup> | 514      | CM+EM     |
| Twin-ZnSe nanowires <sup>[6]</sup>                                 | CV    | 10 <sup>-8</sup>  | 3.02×10 <sup>5</sup> | 532      | CM        |
| CuPc/MoS <sub>2</sub> <sup>[7]</sup>                               | MB    | 10 <sup>-10</sup> | 6.29×10 <sup>6</sup> | 532      | CM        |
| Ti <sub>3</sub> C <sub>2</sub> T <sub>x</sub> MXene <sup>[8]</sup> | MB    | 10 <sup>-8</sup>  | 6.7×10 <sup>6</sup>  | 532      | CM        |
| MoS <sub>2</sub> /TiO <sub>2</sub> <sup>[9]</sup>                  | MB    | 10 <sup>-13</sup> | 2.09×10 <sup>6</sup> | 532      | CM        |
| Er-ZnSe <sup>This work</sup>                                       | MB    | 10 <sup>-7</sup>  | 1.74×10 <sup>4</sup> | 785      | EM+CM     |

## References

- (1) Le Ru, E. C.; Blackie, E.; Meyer, M.; *et al.* Surface Enhanced Raman Scattering Enhancement Factors: A Comprehensive Study. *J. Phys. Chem. C* **2007**, *111* (37), 13794–13803.
- (2) Shafi, M.; Zhou, M.; Duan, P.; *et al.* Highly Sensitive and Recyclable Surface-Enhanced Raman Scattering (SERS) Substrates Based on Photocatalytic Activity of ZnSe Nanowires. *Sens. Actuators, B* **2022**, *356*, 131360.
- (3) Shafi, M.; Duan, P.; Liu, W.; *et al.* Recyclable Surface-Enhanced Raman Spectroscopy (SERS) Platform Fabricated with Ag-Decorated ZnSe Nanowires and Metamaterial. *Sens. Actuators, B* **2023**, *380*, 133410.
- (4) Liu, M.; Hu, X.; Zhang, C.; *et al.* Localized Surface Plasmon Resonance Enhanced Charge Transfer Effect in MoO<sub>2</sub>/ZnSe Nanocomposites Enabling Efficient SERS Detection and Visible-Light Photocatalytic Degradation. *Sens. Actuators, B* **2024**, *398*, 134688.
- (5) Chu, Q.; Wang, W.; Guo, S.; *et al.* Interface Design of 3D Flower-like Ag@ZnSe Composites: SERS and Photocatalytic Performance. *ACS Appl. Mater. Interfaces* **2023**, *15* (8), 11304–11313.
- (6) Wang, G.; Wei, H.; Tian, Y.; *et al.* Twin-ZnSe Nanowires as Surface-Enhanced Raman Scattering Substrate with Significant Enhancement Factor upon Defect. *Opt. Express* **2020**, *28* (13), 18843–18858.
- (7) Lyu, B.; Lyu, Y.; Ma, L.; *et al.* Fluorescence Quenching SERS Detection: A 2D MoS<sub>2</sub> Platform Modified with a Large  $\pi$ -Conjugated Organic Molecule for Bacterial Detection. *Laser Photonics Rev.* **2025**, *19*, 2401831.
- (8) Pramanik, M.; Limaye, M. V.; Sharma, P. K.; *et al.* Improved Surface-Enhanced Raman Scattering Performance of 2D Ti<sub>3</sub>C<sub>2</sub>T<sub>x</sub> MXene Embedded in PVDF Film Enabled by Photoinduction and Electric Field Modulation. *ACS Appl. Mater. Interfaces* **2024**, *16* (22), 29121–29131.
- (9) Quan, Y.; Su, R.; Yang, S.; *et al.* In Situ Surface-Enhanced Raman Scattering Based on MTi<sub>20</sub> Nanoflowers: Monitoring and Degradation of Contaminants. *J. Hazard. Mater.* **2021**, *412*, 125209.
